# Supplementary material for: IGF1, serum glucose, and retinopathy of prematurity in extremely preterm infants
Source: JCI journal article supplement (doi:10.1172/jci.insight.140363), 2020-10-01
Supplement: sd3 [file 3]

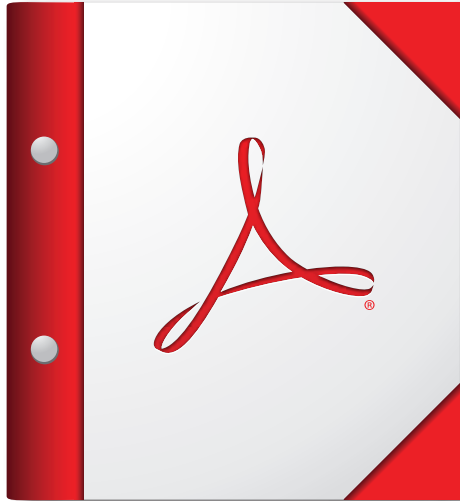

**For the best experience, open this PDF portfolio in  
Acrobat X or Adobe Reader X, or later.**

[Get Adobe Reader Now!](#)
